# Supplementary material for: A GWAS Meta-analysis and Replication Study Identifies a Novel Locus within CLPTM1L/TERT Associated with Nasopharyngeal Carcinoma in Individuals of Chinese Ancestry
Source: Oxford University Press journal article supplement (doi:10.1158/1055-9965.epi-15-0144), 2015-11-06
Supplement: 10559965epi150144-sup-145041_2_supp_3154288_nv1sqn.doc [file 10559965epi150144-sup-145041_2_supp_3154288_nv1sqn.doc]

**Supplemental Figure 1S. Individual Study Results from GWAS Meta-Analysis and Replication Studies for Selected SNPs**

1. **rs31489 B. rs1063192**


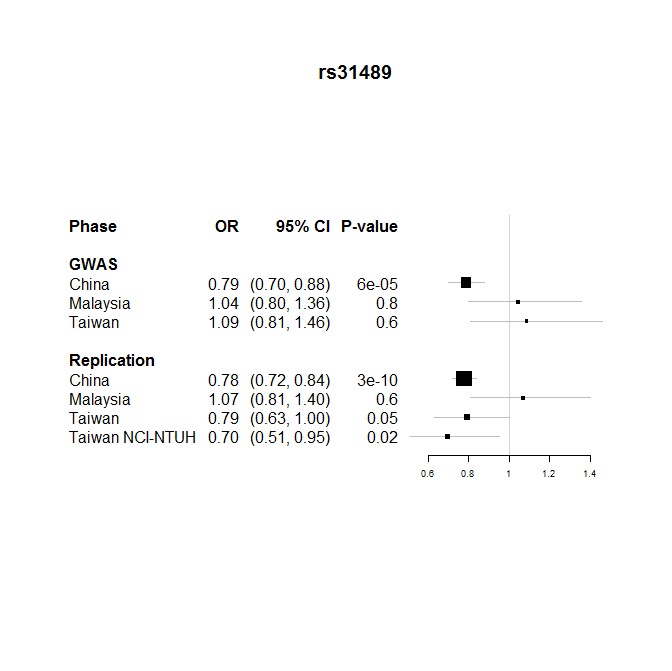

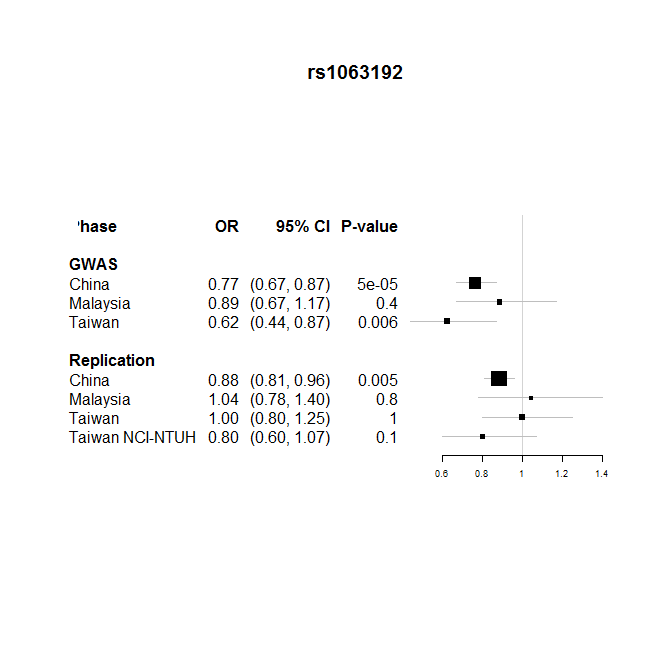


p-heterogeneity across studies: 0.035 p-heterogeneity across studies: 0.097

**Supplemental Figure 1S. Individual Study Results from GWAS Meta-Analysis and Replication Studies for Selected SNPs (continued)**

**C. rs1412829 D. rs4977756**


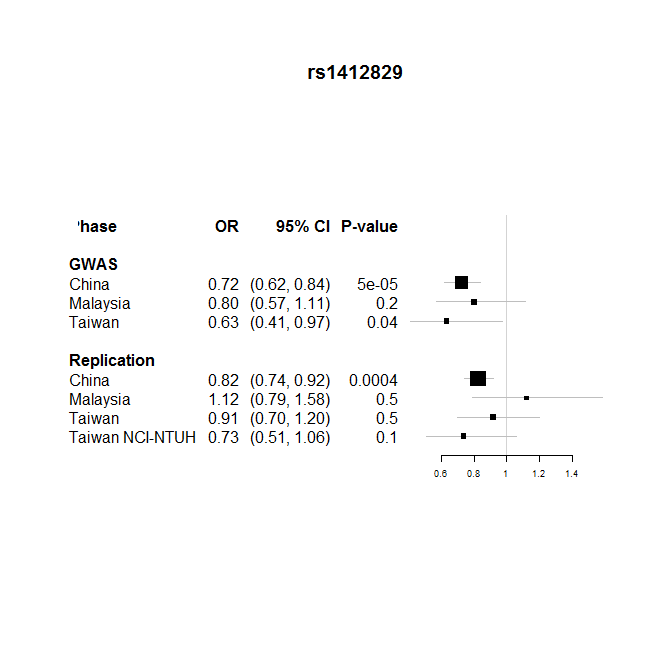

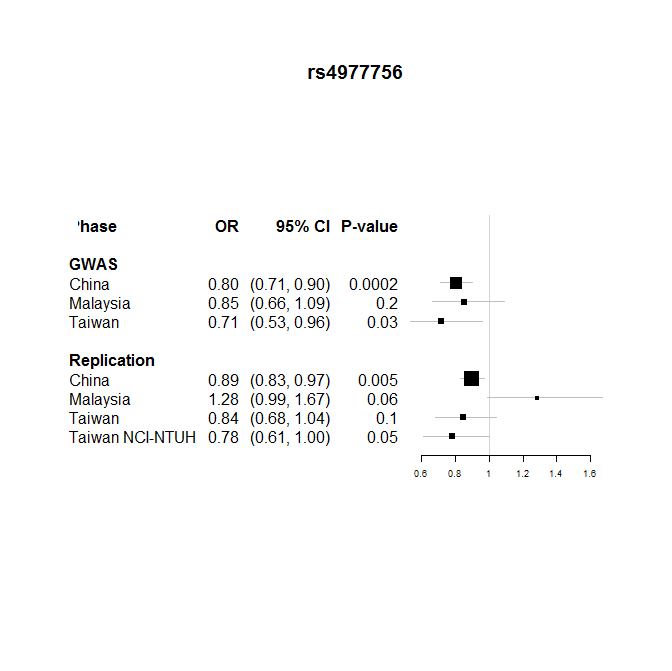


p-heterogeneity across studies: 0.25 p-heterogeneity across studies: 0.039

**Supplemental Figure 1S. Individual Study Results from GWAS Meta-Analysis and Replication Studies for Selected SNPs (continued)**

**E. rs6774494 F. rs9510787**


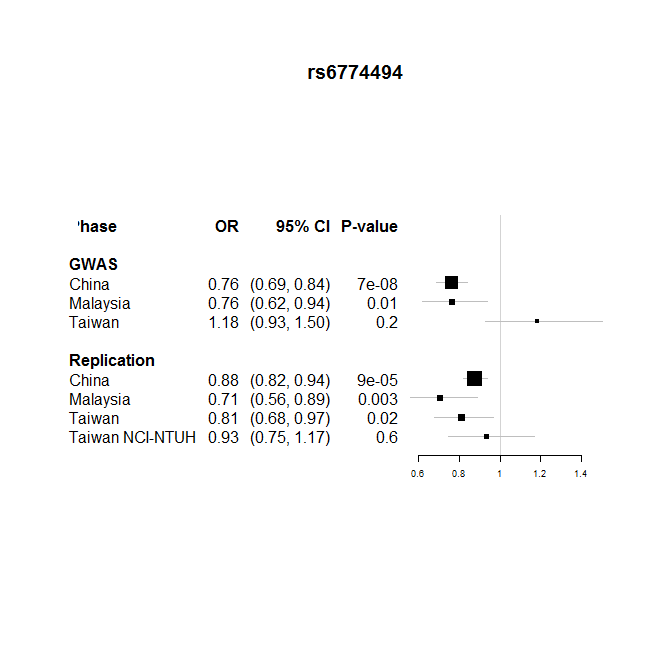

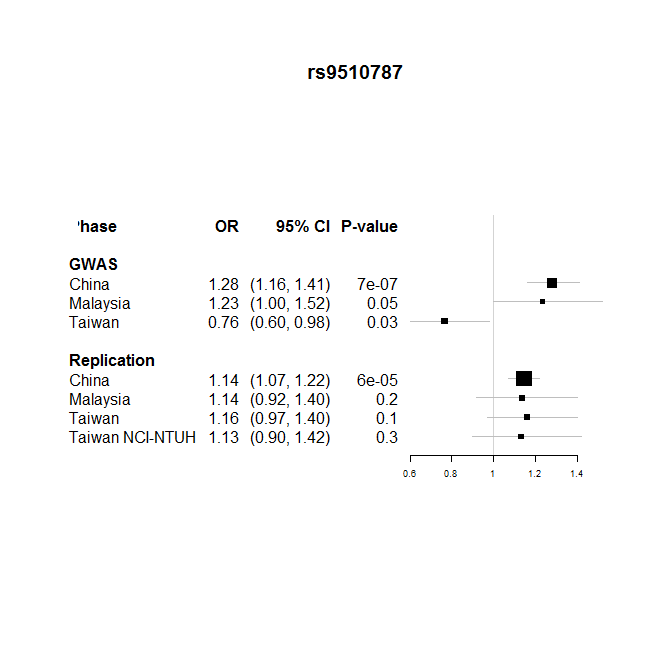


p-heterogeneity across studies: 0.0093 p-heterogeneity across studies: 0.016
